# Supplementary material
Source: PubMed Central journal article supplement (PMC1622777)

**A**

Fitting against structure

Experimental  $^1D_{NH}$  (specific complex)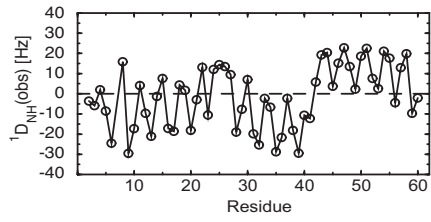Optimization of  
 $D_a$ ,  $R$ ,  $\alpha$ ,  $\beta$ ,  $\gamma$ 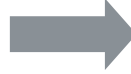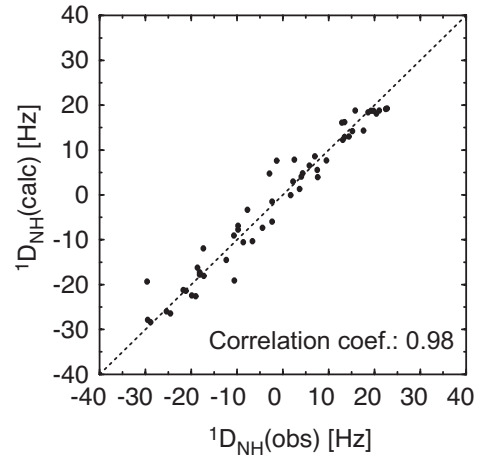+  
Structure (specific complex)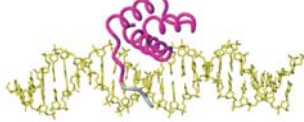**B**

PALES prediction

Structure (specific complex)

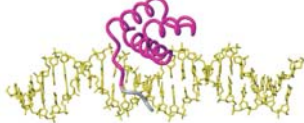Based on  
shape and charge distribution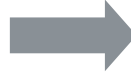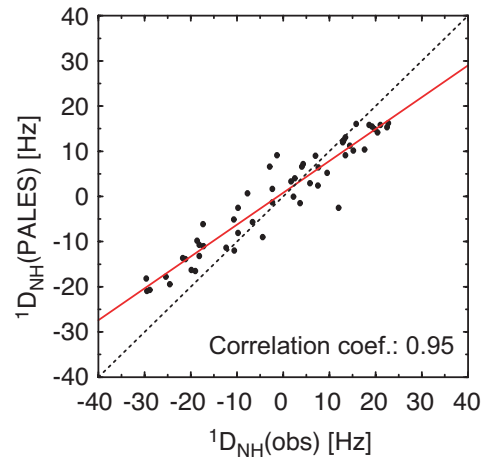

Supplement: pnas_0605868103_1.pdf [file pnas_0605868103_1.pdf]
